# Supplementary material
Source: publisher figshare collection journal article supplement (https://tandf.figshare.com/ndownloader/files/30772812)
Supplement: Supplementary file 1 [file 30772812]

## Sheet: TransformationTable WQ40
Transformationtables
Raw Score	Person Location Logit		Transformation Table 0-400	Transformation Table 0-100	Transformation Table 0-10
0	-3.02		0	0	0
1	-2.464		40.8599	10.2148	1.02148
2	-2.152		63.7885	15.9469	1.59469
3	-1.977		76.649	19.162	1.9162
4	-1.86		85.2472	21.3115	2.13115
5	-1.775		91.4938	22.8731	2.28731
6	-1.71		96.2706	24.0673	2.40673
7	-1.656		100.239	25.0594	2.50594
8	-1.61		103.619	25.9045	2.59045
9	-1.571		106.486	26.621	2.6621
10	-1.537		108.984	27.2457	2.72457
11	-1.506		111.262	27.8152	2.78152
12	-1.478		113.32	28.3296	2.83296
13	-1.453		115.157	28.7889	2.87889
14	-1.429		116.921	29.2299	2.92299
15	-1.408		118.464	29.6157	2.96157
16	-1.387		120.008	30.0015	3.00015
17	-1.368		121.404	30.3505	3.03505
18	-1.35		122.727	30.6812	3.06812
19	-1.333		123.976	30.9936	3.09936
20	-1.316		125.225	31.3059	3.13059
21	-1.301		126.328	31.5815	3.15815
22	-1.286		127.43	31.857	3.1857
23	-1.271		128.532	32.1326	3.21326
24	-1.257		129.561	32.3898	3.23898
25	-1.244		130.516	32.6287	3.26287
26	-1.231		131.472	32.8675	3.28675
27	-1.218		132.427	33.1063	3.31063
28	-1.206		133.309	33.3268	3.33268
29	-1.194		134.191	33.5473	3.35473
30	-1.182		135.073	33.7677	3.37677
31	-1.171		135.881	33.9698	3.39698
32	-1.16		136.69	34.1719	3.41719
33	-1.149		137.498	34.374	3.4374
34	-1.139		138.233	34.5577	3.45577
35	-1.128		139.041	34.7598	3.47598
36	-1.118		139.776	34.9435	3.49435
37	-1.108		140.511	35.1273	3.51273
38	-1.098		141.246	35.311	3.5311
39	-1.089		141.907	35.4763	3.54763
40	-1.08		142.569	35.6417	3.56417
41	-1.071		143.23	35.807	3.5807
42	-1.062		143.891	35.9724	3.59724
43	-1.053		144.553	36.1377	3.61377
44	-1.044		145.214	36.3031	3.63031
45	-1.036		145.802	36.45	3.645
46	-1.028		146.39	36.597	3.6597
47	-1.02		146.978	36.744	3.6744
48	-1.012		147.566	36.891	3.6891
49	-1.004		148.154	37.038	3.7038
50	-0.996		148.742	37.1849	3.71849
51	-0.988		149.33	37.3319	3.73319
52	-0.981		149.844	37.4605	3.74605
53	-0.974		150.358	37.5891	3.75891
54	-0.967		150.873	37.7177	3.77177
55	-0.96		151.387	37.8463	3.78463
56	-0.953		151.902	37.9749	3.79749
57	-0.946		152.416	38.1035	3.81035
58	-0.939		152.931	38.2321	3.82321
59	-0.932		153.445	38.3607	3.83607
60	-0.925		153.959	38.4893	3.84893
61	-0.918		154.474	38.6179	3.86179
62	-0.912		154.915	38.7282	3.87282
63	-0.905		155.429	38.8568	3.88568
64	-0.898		155.944	38.9854	3.89854
65	-0.892		156.385	39.0956	3.90956
66	-0.885		156.899	39.2242	3.92242
67	-0.879		157.34	39.3345	3.93345
68	-0.872		157.854	39.4631	3.94631
69	-0.839		160.28	40.0693	4.00693
70	-0.859		158.81	39.7019	3.97019
71	-0.852		159.324	39.8305	3.98305
72	-0.845		159.839	39.9591	3.99591
73	-0.838		160.353	40.0877	4.00877
74	-0.832		160.794	40.1979	4.01979
75	-0.825		161.308	40.3265	4.03265
76	-0.818		161.823	40.4551	4.04551
77	-0.811		162.337	40.5837	4.05837
78	-0.805		162.778	40.694	4.0694
79	-0.798		163.293	40.8226	4.08226
80	-0.791		163.807	40.9512	4.09512
81	-0.784		164.321	41.0798	4.10798
82	-0.776		164.909	41.2268	4.12268
83	-0.769		165.424	41.3554	4.13554
84	-0.762		165.938	41.484	4.1484
85	-0.755		166.453	41.6126	4.16126
86	-0.748		166.967	41.7412	4.17412
87	-0.741		167.481	41.8698	4.18698
88	-0.733		168.069	42.0168	4.20168
89	-0.726		168.584	42.1454	4.21454
90	-0.718		169.172	42.2923	4.22923
91	-0.711		169.686	42.4209	4.24209
92	-0.703		170.274	42.5679	4.25679
93	-0.696		170.788	42.6965	4.26965
94	-0.688		171.376	42.8435	4.28435
95	-0.681		171.891	42.9721	4.29721
96	-0.673		172.479	43.1191	4.31191
97	-0.665		173.067	43.2661	4.32661
98	-0.658		173.581	43.3947	4.33947
99	-0.65		174.169	43.5416	4.35416
100	-0.642		174.757	43.6886	4.36886
101	-0.634		175.345	43.8356	4.38356
102	-0.627		175.859	43.9642	4.39642
103	-0.619		176.447	44.1112	4.41112
104	-0.611		177.035	44.2581	4.42581
105	-0.603		177.623	44.4051	4.44051
106	-0.595		178.211	44.5521	4.45521
107	-0.587		178.799	44.6991	4.46991
108	-0.579		179.387	44.8461	4.48461
109	-0.571		179.975	44.993	4.4993
110	-0.563		180.562	45.14	4.514
111	-0.555		181.15	45.287	4.5287
112	-0.547		181.738	45.434	4.5434
113	-0.539		182.326	45.5809	4.55809
114	-0.531		182.914	45.7279	4.57279
115	-0.523		183.502	45.8749	4.58749
116	-0.515		184.09	46.0219	4.60219
117	-0.507		184.678	46.1688	4.61688
118	-0.499		185.266	46.3158	4.63158
119	-0.491		185.854	46.4628	4.64628
120	-0.483		186.442	46.6098	4.66098
121	-0.475		187.03	46.7567	4.67567
122	-0.467		187.617	46.9037	4.69037
123	-0.459		188.205	47.0507	4.70507
124	-0.45		188.867	47.216	4.7216
125	-0.442		189.455	47.363	4.7363
126	-0.434		190.043	47.51	4.751
127	-0.426		190.63	47.657	4.7657
128	-0.418		191.218	47.8039	4.78039
129	-0.41		191.806	47.9509	4.79509
130	-0.402		192.394	48.0979	4.80979
131	-0.394		192.982	48.2449	4.82449
132	-0.385		193.644	48.4102	4.84102
133	-0.377		194.231	48.5572	4.85572
134	-0.369		194.819	48.7042	4.87042
135	-0.361		195.407	48.8511	4.88511
136	-0.353		195.995	48.9981	4.89981
137	-0.345		196.583	49.1451	4.91451
138	-0.337		197.171	49.2921	4.92921
139	-0.328		197.832	49.4574	4.94574
140	-0.32		198.42	49.6044	4.96044
141	-0.312		199.008	49.7514	4.97514
142	-0.304		199.596	49.8984	4.98984
143	-0.296		200.184	50.0453	5.00453
144	-0.288		200.772	50.1923	5.01923
145	-0.28		201.36	50.3393	5.03393
146	-0.271		202.021	50.5046	5.05046
147	-0.263		202.609	50.6516	5.06516
148	-0.255		203.197	50.7986	5.07986
149	-0.247		203.785	50.9456	5.09456
150	-0.239		204.373	51.0925	5.10925
151	-0.231		204.961	51.2395	5.12395
152	-0.223		205.549	51.3865	5.13865
153	-0.215		206.137	51.5335	5.15335
154	-0.207		206.725	51.6804	5.16804
155	-0.199		207.312	51.8274	5.18274
156	-0.19		207.974	51.9928	5.19928
157	-0.182		208.562	52.1397	5.21397
158	-0.174		209.15	52.2867	5.22867
159	-0.166		209.738	52.4337	5.24337
160	-0.158		210.326	52.5807	5.25807
161	-0.15		210.913	52.7276	5.27276
162	-0.142		211.501	52.8746	5.28746
163	-0.134		212.089	53.0216	5.30216
164	-0.126		212.677	53.1686	5.31686
165	-0.118		213.265	53.3155	5.33155
166	-0.11		213.853	53.4625	5.34625
167	-0.102		214.441	53.6095	5.36095
168	-0.094		215.029	53.7565	5.37565
169	-0.086		215.617	53.9034	5.39034
170	-0.078		216.205	54.0504	5.40504
171	-0.071		216.719	54.179	5.4179
172	-0.063		217.307	54.326	5.4326
173	-0.055		217.895	54.473	5.4473
174	-0.047		218.483	54.62	5.462
175	-0.039		219.071	54.7669	5.47669
176	-0.031		219.659	54.9139	5.49139
177	-0.023		220.247	55.0609	5.50609
178	-0.016		220.761	55.1895	5.51895
179	-0.008		221.349	55.3365	5.53365
180	0		221.937	55.4834	5.54834
181	0.008		222.525	55.6304	5.56304
182	0.016		223.113	55.7774	5.57774
183	0.023		223.627	55.906	5.5906
184	0.031		224.215	56.053	5.6053
185	0.039		224.803	56.1999	5.61999
186	0.046		225.317	56.3286	5.63286
187	0.054		225.905	56.4755	5.64755
188	0.062		226.493	56.6225	5.66225
189	0.069		227.008	56.7511	5.67511
190	0.077		227.595	56.8981	5.68981
191	0.085		228.183	57.0451	5.70451
192	0.092		228.698	57.1737	5.71737
193	0.1		229.286	57.3206	5.73206
194	0.107		229.8	57.4492	5.74492
195	0.115		230.388	57.5962	5.75962
196	0.122		230.902	57.7248	5.77248
197	0.13		231.49	57.8718	5.78718
198	0.137		232.005	58.0004	5.80004
199	0.145		232.593	58.1474	5.81474
200	0.152		233.107	58.276	5.8276
201	0.16		233.695	58.423	5.8423
202	0.167		234.209	58.5516	5.85516
203	0.174		234.724	58.6802	5.86802
204	0.182		235.312	58.8271	5.88271
205	0.189		235.826	58.9557	5.89557
206	0.196		236.341	59.0844	5.90844
207	0.203		236.855	59.213	5.9213
208	0.211		237.443	59.3599	5.93599
209	0.218		237.957	59.4885	5.94885
210	0.225		238.472	59.6171	5.96171
211	0.232		238.986	59.7457	5.97457
212	0.239		239.501	59.8743	5.98743
213	0.247		240.089	60.0213	6.00213
214	0.254		240.603	60.1499	6.01499
215	0.261		241.117	60.2785	6.02785
216	0.268		241.632	60.4071	6.04071
217	0.275		242.146	60.5357	6.05357
218	0.282		242.661	60.6643	6.06643
219	0.289		243.175	60.7929	6.07929
220	0.296		243.69	60.9216	6.09216
221	0.303		244.204	61.0502	6.10502
222	0.31		244.718	61.1788	6.11788
223	0.316		245.159	61.289	6.1289
224	0.323		245.674	61.4176	6.14176
225	0.33		246.188	61.5462	6.15462
226	0.337		246.703	61.6748	6.16748
227	0.344		247.217	61.8034	6.18034
228	0.35		247.658	61.9136	6.19136
229	0.357		248.172	62.0422	6.20422
230	0.364		248.687	62.1708	6.21708
231	0.37		249.128	62.2811	6.22811
232	0.377		249.642	62.4097	6.24097
233	0.383		250.083	62.5199	6.25199
234	0.39		250.597	62.6485	6.26485
235	0.396		251.038	62.7588	6.27588
236	0.403		251.553	62.8874	6.28874
237	0.409		251.994	62.9976	6.29976
238	0.416		252.508	63.1262	6.31262
239	0.422		252.949	63.2364	6.32364
240	0.429		253.464	63.365	6.3365
241	0.435		253.904	63.4753	6.34753
242	0.442		254.419	63.6039	6.36039
243	0.448		254.86	63.7141	6.37141
244	0.454		255.301	63.8243	6.38243
245	0.461		255.815	63.9529	6.39529
246	0.468		256.33	64.0815	6.40815
247	0.475		256.844	64.2101	6.42101
248	0.483		257.432	64.3571	6.43571
249	0.491		258.02	64.5041	6.45041
250	0.496		258.387	64.596	6.4596
251	0.504		258.975	64.7429	6.47429
252	0.512		259.563	64.8899	6.48899
253	0.519		260.078	65.0185	6.50185
254	0.526		260.592	65.1471	6.51471
255	0.532		261.033	65.2573	6.52573
256	0.537		261.4	65.3492	6.53492
257	0.542		261.768	65.4411	6.54411
258	0.546		262.062	65.5146	6.55146
259	0.549		262.282	65.5697	6.55697
260	0.553		262.576	65.6432	6.56432
261	0.557		262.87	65.7166	6.57166
262	0.56		263.091	65.7718	6.57718
263	0.563		263.311	65.8269	6.58269
264	0.566		263.532	65.882	6.5882
265	0.568		263.679	65.9187	6.59187
266	0.57		263.826	65.9555	6.59555
267	0.574		264.119	66.029	6.6029
268	0.576		264.266	66.0657	6.60657
269	0.578		264.413	66.1025	6.61025
270	0.581		264.634	66.1576	6.61576
271	0.583		264.781	66.1943	6.61943
272	0.586		265.001	66.2494	6.62494
273	0.585		264.928	66.2311	6.62311
274	0.587		265.075	66.2678	6.62678
275	0.588		265.148	66.2862	6.62862
276	0.592		265.442	66.3597	6.63597
277	0.594		265.589	66.3964	6.63964
278	0.597		265.81	66.4515	6.64515
279	0.595		265.663	66.4148	6.64148
280	0.597		265.81	66.4515	6.64515
281	0.598		265.883	66.4699	6.64699
282	0.6		266.03	66.5066	6.65066
283	0.601		266.104	66.525	6.6525
284	0.605		266.398	66.5985	6.65985
285	0.608		266.618	66.6536	6.66536
286	0.61		266.765	66.6904	6.66904
287	0.608		266.618	66.6536	6.66536
288	0.609		266.692	66.672	6.6672
289	0.611		266.839	66.7087	6.67087
290	0.612		266.912	66.7271	6.67271
291	0.616		267.206	66.8006	6.68006
292	0.618		267.353	66.8373	6.68373
293	0.619		267.426	66.8557	6.68557
294	0.621		267.573	66.8925	6.68925
295	0.62		267.5	66.8741	6.68741
296	0.62		267.5	66.8741	6.68741
297	0.621		267.573	66.8925	6.68925
298	0.626		267.941	66.9843	6.69843
299	0.629		268.161	67.0394	6.70394
300	0.627		268.014	67.0027	6.70027
301	0.629		268.161	67.0394	6.70394
302	0.63		268.235	67.0578	6.70578
303	0.634		268.529	67.1313	6.71313
304	0.636		268.676	67.168	6.7168
305	0.639		268.896	67.2231	6.72231
306	0.639		268.896	67.2231	6.72231
307	0.642		269.117	67.2783	6.72783
308	0.643		269.19	67.2966	6.72966
309	0.691		272.718	68.1785	6.81785
310	0.647		269.484	67.3701	6.73701
311	0.649		269.631	67.4069	6.74069
312	0.505		259.049	64.7613	6.47613
313	0.654		269.999	67.4987	6.74987
314	0.427		253.317	63.3283	6.33283
315	0.66		270.44	67.609	6.7609
316	0.412		252.214	63.0527	6.30527
317	0.955		292.119	73.0287	7.30287
318	0.365		248.76	62.1892	6.21892
319	0.99		294.691	73.6717	7.36717
320	0.193		236.12	59.0292	5.90292
321	0.679		271.836	67.958	6.7958
322	0.285		242.881	60.7195	6.07195
323	0.442		254.419	63.6039	6.36039
324	0.692		272.791	68.1969	6.81969
325	0.696		273.085	68.2704	6.82704
326	1.052		299.247	74.8108	7.48108
327	0.703		273.6	68.399	6.8399
328	0.71		274.114	68.5276	6.85276
329	0.714		274.408	68.601	6.8601
330	0.718		274.702	68.6745	6.86745
331	0.721		274.922	68.7297	6.87297
332	0.725		275.216	68.8031	6.88031
333	0.728		275.437	68.8583	6.88583
334	0.384		250.157	62.5383	6.25383
335	0.735		275.951	68.9869	6.89869
336	0.474		256.771	64.1918	6.41918
337	0.402		251.479	62.869	6.2869
338	0.745		276.686	69.1706	6.91706
339	0.749		276.98	69.2441	6.92441
340	0.751		277.127	69.2808	6.92808
341	0.722		274.996	68.748	6.8748
342	0.757		277.568	69.391	6.9391
343	0.76		277.788	69.4462	6.94462
344	0.763		278.009	69.5013	6.95013
345	0.766		278.229	69.5564	6.95564
346	0.77		278.523	69.6299	6.96299
347	0.773		278.744	69.685	6.9685
348	0.776		278.964	69.7401	6.97401
349	0.78		279.258	69.8136	6.98136
350	0.783		279.479	69.8687	6.98687
351	0.787		279.773	69.9422	6.99422
352	0.791		280.067	70.0157	7.00157
353	0.794		280.287	70.0708	7.00708
354	0.799		280.654	70.1627	7.01627
355	0.803		280.948	70.2362	7.02362
356	0.807		281.242	70.3096	7.03096
357	0.812		281.61	70.4015	7.04015
358	0.817		281.977	70.4934	7.04934
359	0.822		282.345	70.5852	7.05852
360	0.827		282.712	70.6771	7.06771
361	0.832		283.08	70.7689	7.07689
362	0.838		283.521	70.8792	7.08792
363	0.845		284.035	71.0078	7.10078
364	0.852		284.549	71.1364	7.11364
365	0.86		285.137	71.2834	7.12834
366	0.869		285.799	71.4487	7.14487
367	0.876		286.313	71.5773	7.15773
368	0.886		287.048	71.761	7.1761
369	0.895		287.709	71.9264	7.19264
370	0.907		288.591	72.1468	7.21468
371	0.916		289.253	72.3122	7.23122
372	0.929		290.208	72.551	7.2551
373	0.94		291.016	72.7531	7.27531
374	0.952		291.898	72.9736	7.29736
375	0.964		292.78	73.194	7.3194
376	0.976		293.662	73.4145	7.34145
377	0.988		294.544	73.635	7.3635
378	1.001		295.499	73.8738	7.38738
379	1.014		296.455	74.1126	7.41126
380	1.027		297.41	74.3515	7.43515
381	1.041		298.439	74.6087	7.46087
382	1.055		299.468	74.8659	7.48659
383	1.07		300.57	75.1415	7.51415
384	1.085		301.672	75.4171	7.54171
385	1.101		302.848	75.711	7.5711
386	1.118		304.097	76.0233	7.60233
387	1.136		305.42	76.354	7.6354
388	1.154		306.743	76.6847	7.66847
389	1.175		308.286	77.0705	7.70705
390	1.197		309.903	77.4747	7.74747
391	1.222		311.74	77.934	7.7934
392	1.249		313.725	78.4301	7.84301
393	1.281		316.076	79.018	7.9018
394	1.319		318.869	79.7161	7.97161
395	1.365		322.249	80.5612	8.05612
396	1.425		326.659	81.6635	8.16635
397	1.51		332.905	83.2252	8.32252
398	1.645		342.826	85.7054	8.57054
399	1.908		362.154	90.5372	9.05372
400	2.423		400.001	99.9988	9.99988
